# Supplementary material for: The CO release properties of κ2N1,N2Mn(i) tricarbonyl photoCORMs with tridentate benzimidazole coligands
Source: Royal Society of Chemistry journal article supplement (doi:10.1039/c7qi00390k), 2017-01-01
Supplement: c7qi00390k1.pdf [file c7qi00390k1.pdf]

# The CO release properties of $\kappa^2N^1,N^2$ Mn(I) tricarbonyl PhotoCORMs with tridentate benzimidazole coligands

Ahmed M. Mansour, <sup>a,b\*</sup>, Alexandra Friedrich <sup>b</sup>

<sup>a</sup> Department of Chemistry, Faculty of Science, Cairo University,  
Gamma Street, Giza, Cairo 12613, Egypt

<sup>b</sup> Institut für Anorganische Chemie, Julius-Maximilians-Universität Würzburg,  
Am Hubland, D-97074 Würzburg, Germany

\* [mansour@sci.cu.edu.eg](mailto:mansour@sci.cu.edu.eg);  
[ahmed.mansour@uni-wuerzburg.de](mailto:ahmed.mansour@uni-wuerzburg.de)

\* Corresponding author

Supporting Information

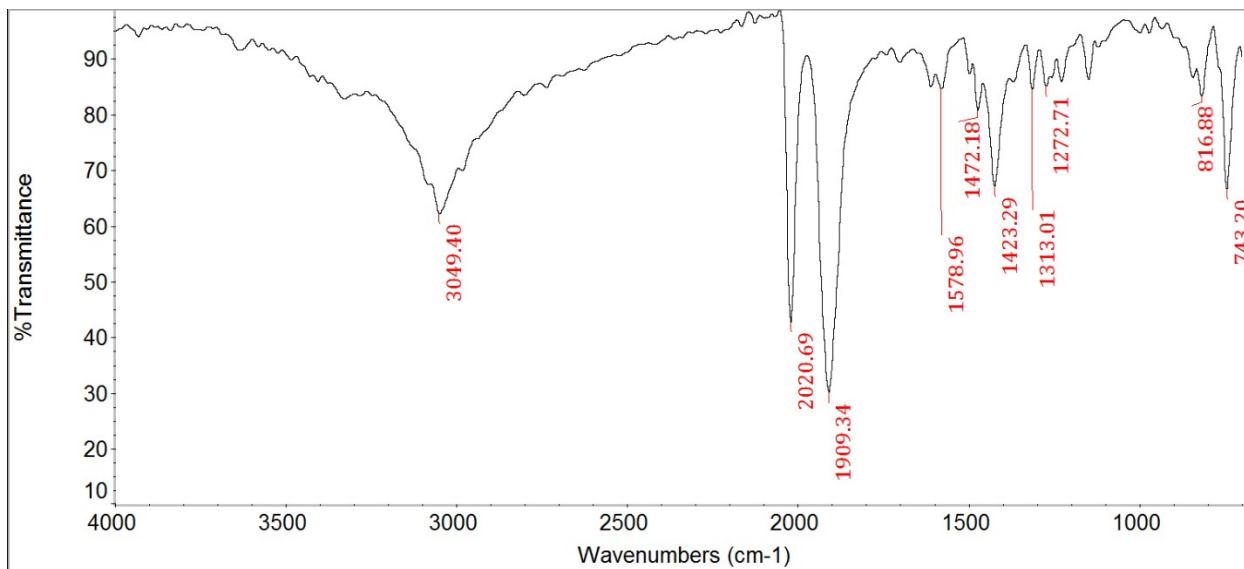

a)

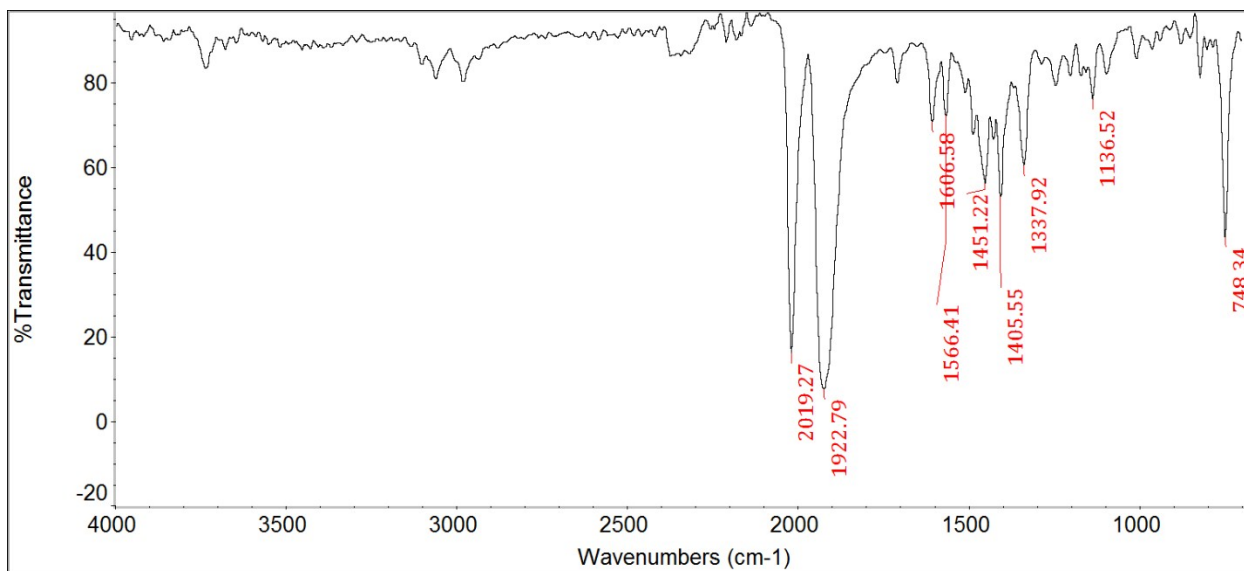

b)

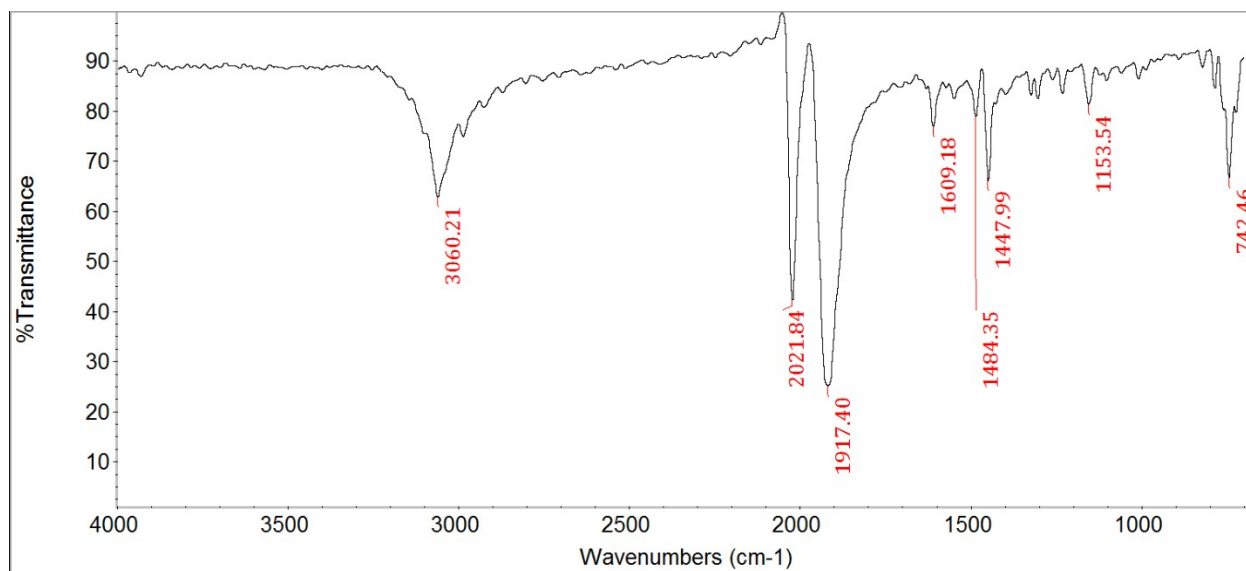

c)

Fig. S1†: AT IR spectra of a) 1, b) 2 and c) 3.

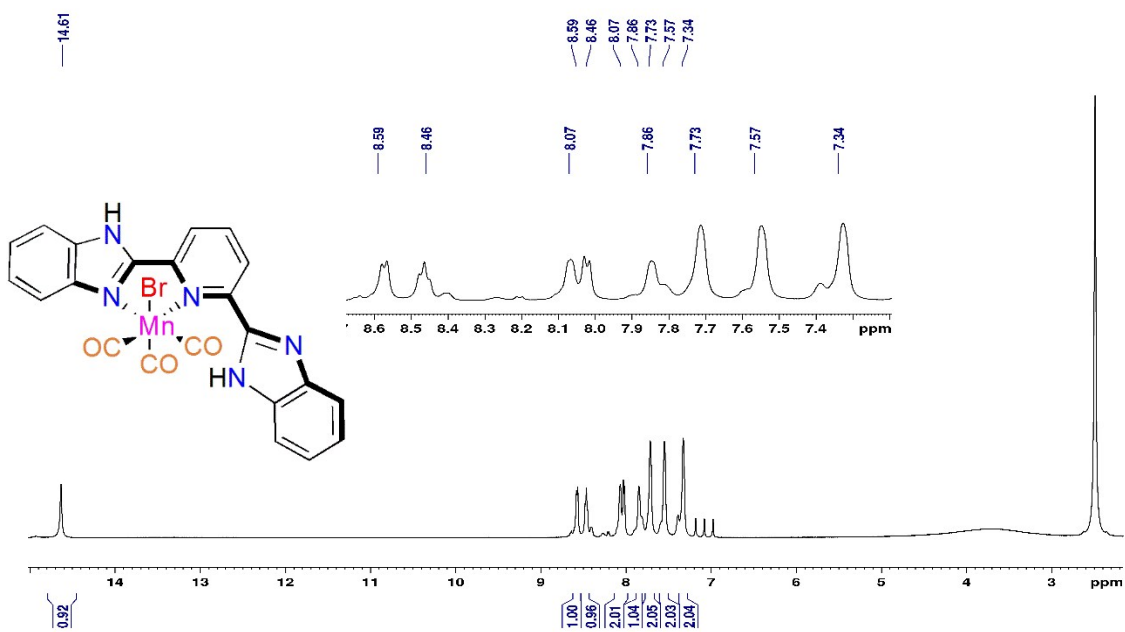

a)

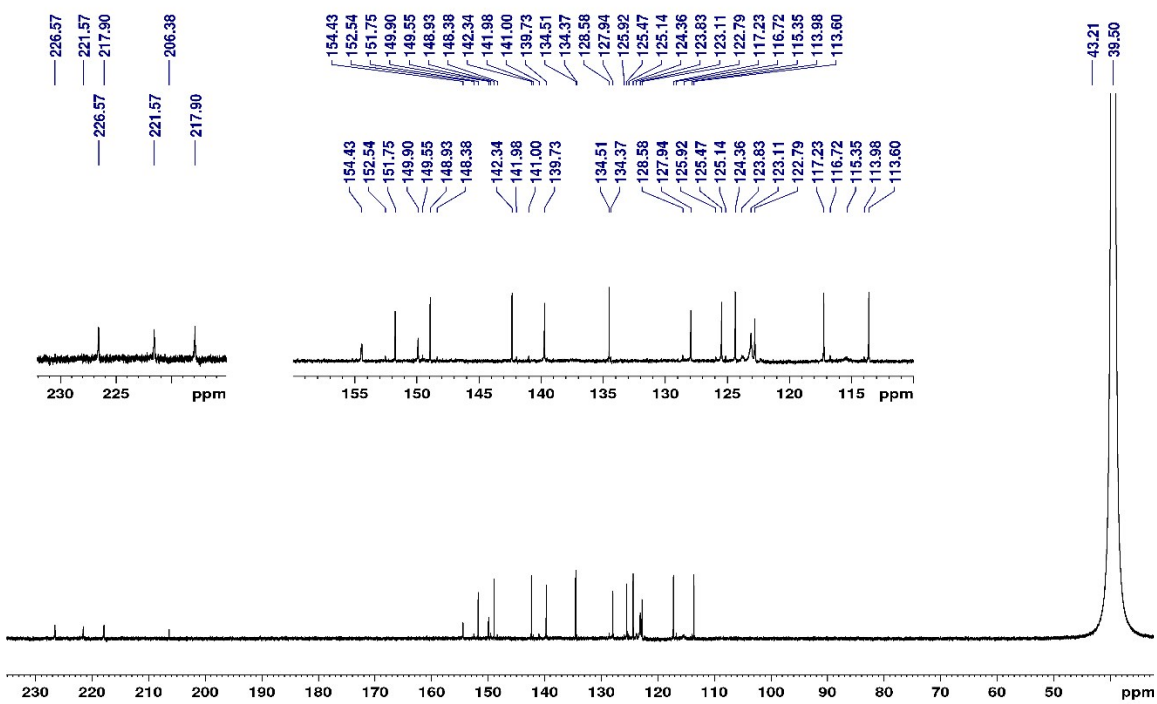

b)

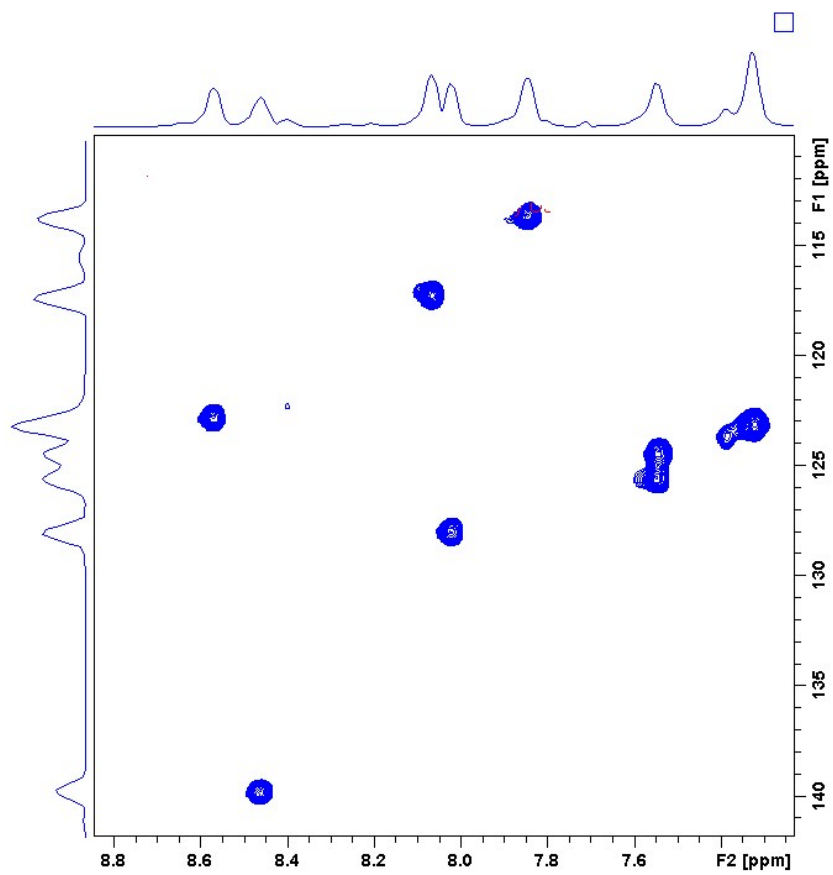

Fig. S2†: NMR analysis of **1** in DMSO- $d_6$ , a)  $^1\text{H}$ , b)  $^{13}\text{C}$  and c)  $\{^{13}\text{C}, ^1\text{H}\}$  HSQC.

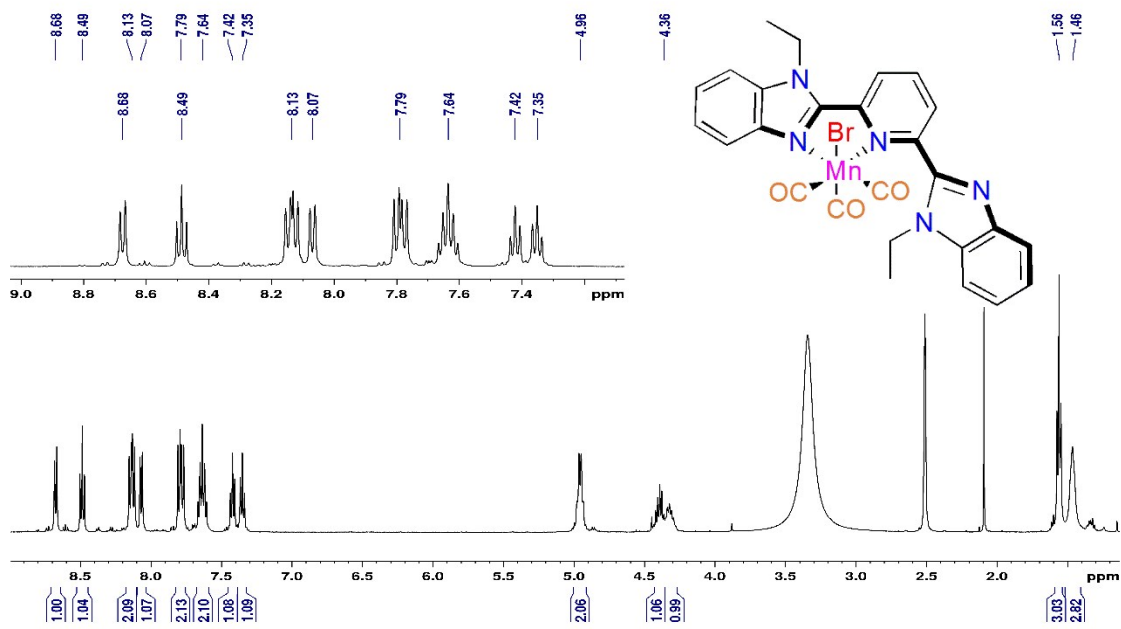

a)

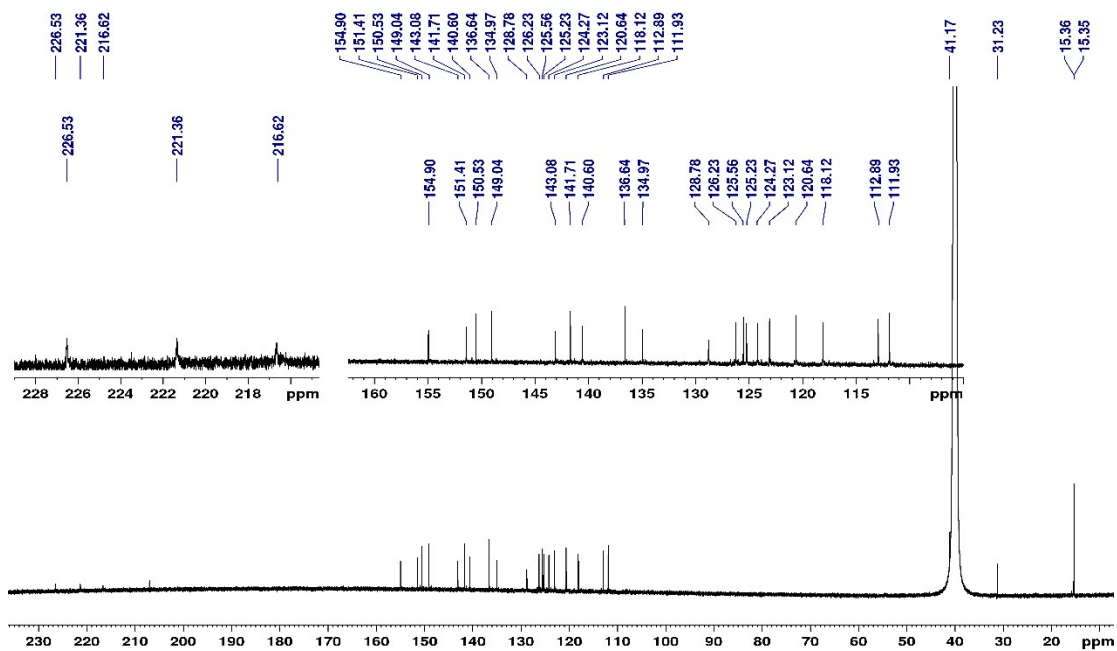

b)

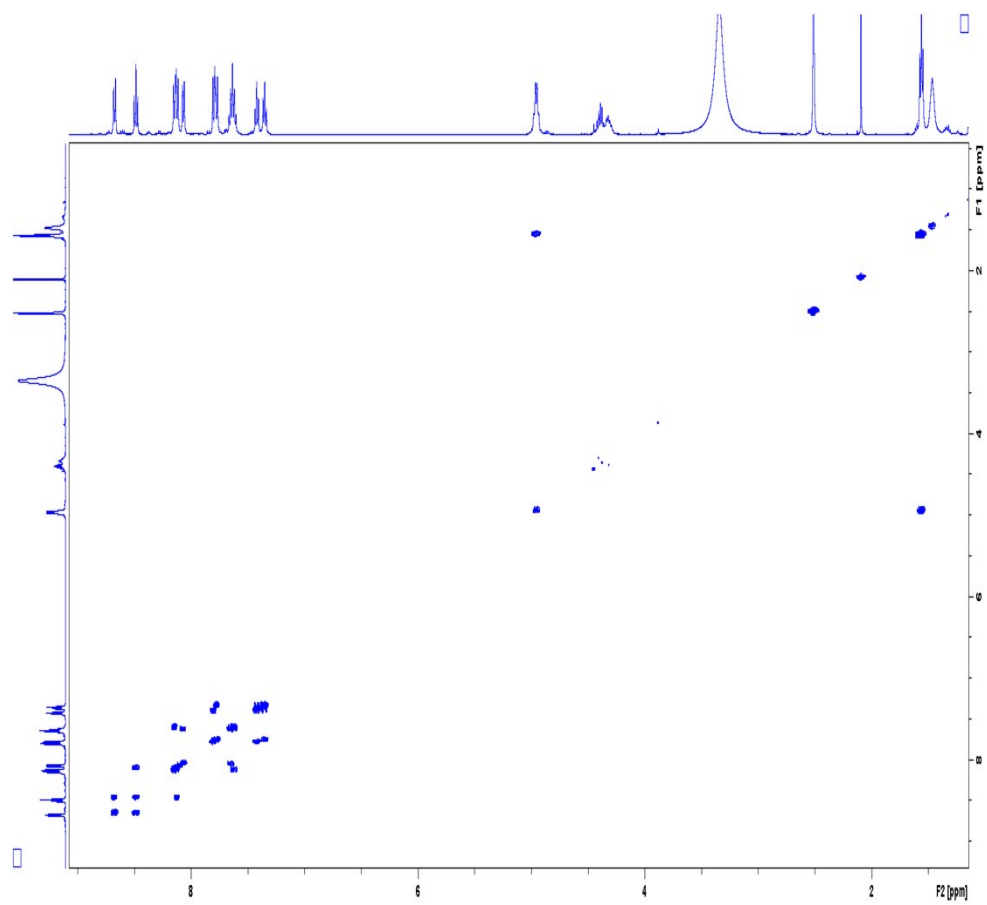

c)

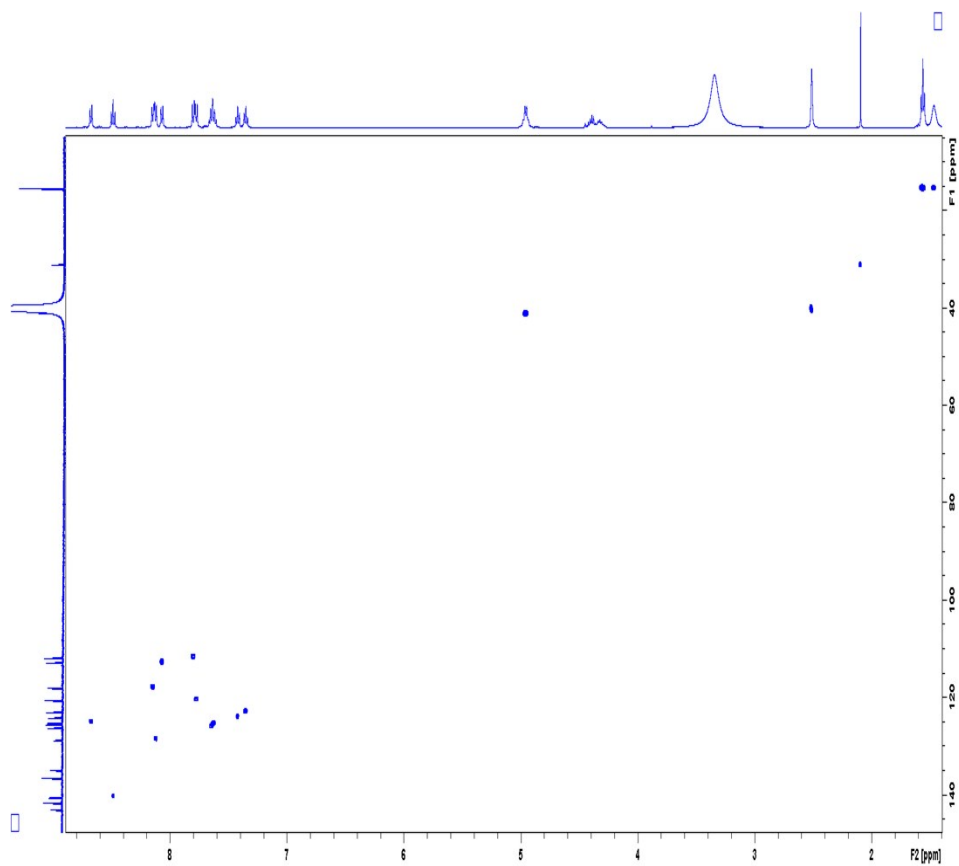

d)

Fig. S3†: NMR analysis of **2** in DMSO- $d_6$ , a)  $^1\text{H}$ , b)  $^{13}\text{C}$ , c)  $\{^1\text{H}, ^1\text{H}\}$  COSY and d)  $\{^{13}\text{C}, ^1\text{H}\}$  HSQC.



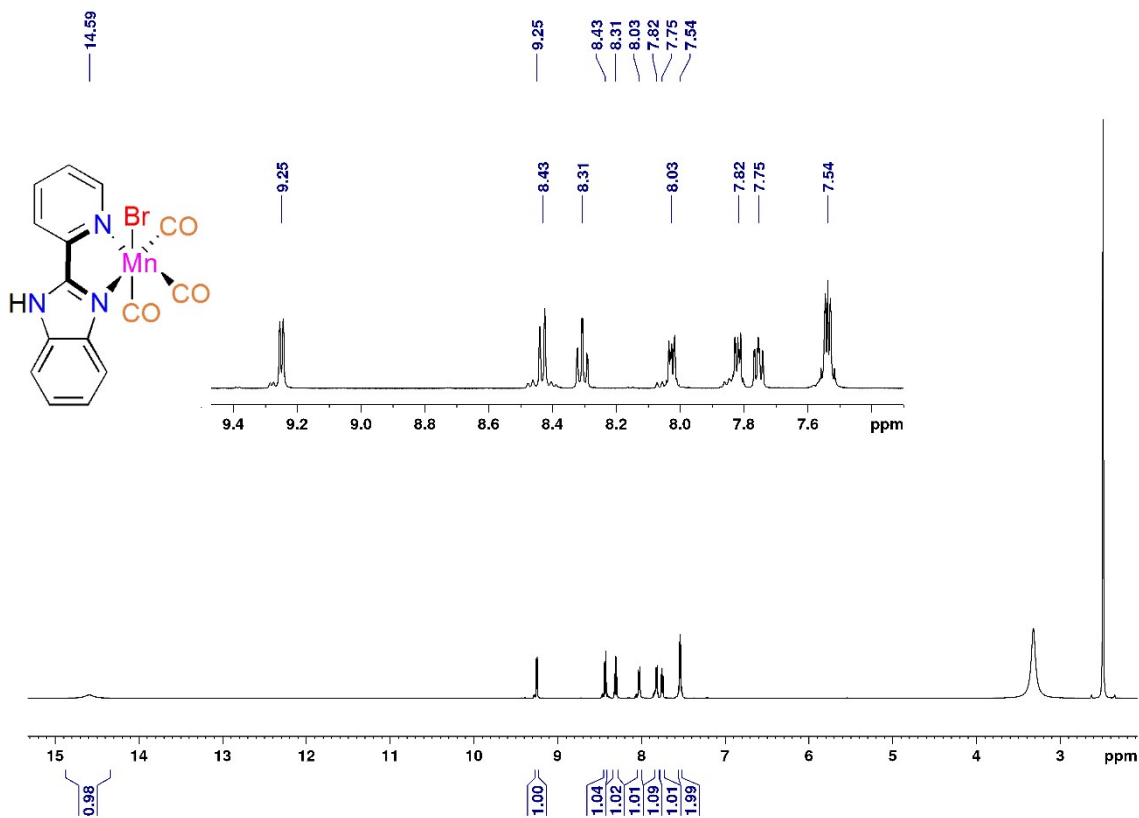

a)

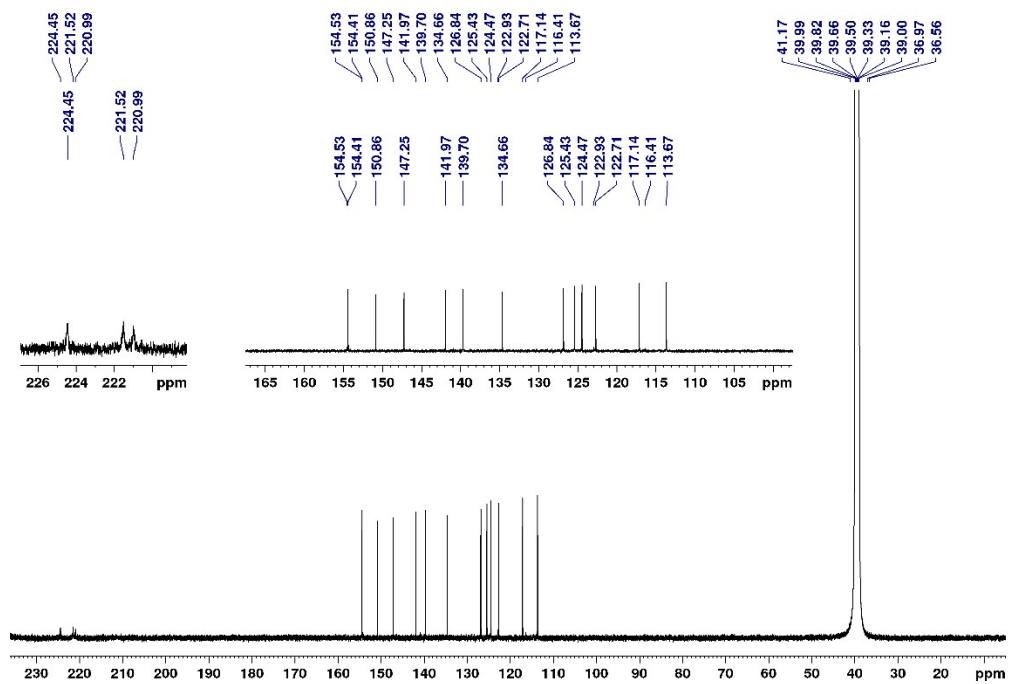

b)

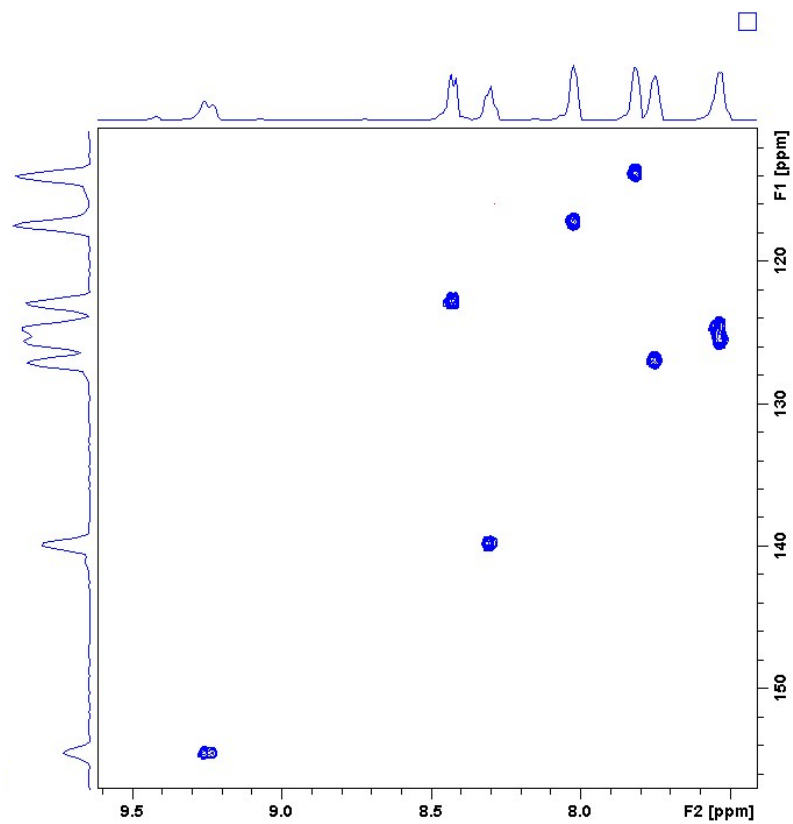

c)

Fig. S4†: NMR analysis of **3** in DMSO- $d_6$ , a)  $^1\text{H}$ , b)  $^{13}\text{C}$  and c)  $\{^{13}\text{C}, ^1\text{H}\}$  HSQC.

| Table S1†: Selected experimental and theoretical bond lengths (Å) and angles (°) of complexes <b>1</b> and <b>2</b> . |           |                   |                |                        |                      |              |            |                   |                |                    |                      |
|-----------------------------------------------------------------------------------------------------------------------|-----------|-------------------|----------------|------------------------|----------------------|--------------|------------|-------------------|----------------|--------------------|----------------------|
|                                                                                                                       | <b>1</b>  |                   |                |                        |                      |              | <b>2</b>   |                   |                |                    |                      |
|                                                                                                                       | Exp.      | B3LYP/<br>LANL2DZ | B3LYP/<br>Gen* | B3LYP/<br>def2-<br>SVP | M05/<br>def2-<br>SVP |              | Exp.       | B3LYP/<br>LANL2DZ | B3LYP/<br>Gen* | B3LYP/<br>def2-SVP | M05/<br>def2-<br>SVP |
| Mn-C(1)                                                                                                               | 1.809(3)  | 1.819             | 1.812          | 1.823                  | 1.794                | Mn-C(1)      | 1.807 (2)  | 1.819             | 1.811          | 1.821              | 1.792                |
| Mn-C(2)                                                                                                               | 1.805(3)  | 1.805             | 1.796          | 1.808                  | 1.778                | Mn-C(2)      | 1.804 (2)  | 1.819             | 1.796          | 1.808              | 1.777                |
| Mn-C(3)                                                                                                               | 1.847(3)  | 1.801             | 1.791          | 1.813                  | 1.792                | Mn-C(3)      | 1.800 (2)  | 1.800             | 1.790          | 1.812              | 1.792                |
| Mn-N(1)                                                                                                               | 2.028(3)  | 2.034             | 2.054          | 2.074                  | 2.080                | Mn-N(1)      | 2.027 (2)  | 2.024             | 2.045          | 2.063              | 2.069                |
| Mn-N(3)                                                                                                               | 2.130(2)  | 2.123             | 2.144          | 2.175                  | 2.197                | Mn-N(3)      | 2.110 (2)  | 2.111             | 2.134          | 2.163              | 2.186                |
| Mn-Br                                                                                                                 | 2.534(1)  | 2.622             | 2.660          | 2.572                  | 2.530                | Mn-Br        | 2.5457 (8) | 2.630             | 2.666          | 2.577              | 2.536                |
| C(1)-O(1)                                                                                                             | 1.153(4)  | 1.179             | 1.154          | 1.149                  | 1.153                | C(1)-O(1)    | 1.139 (2)  | 1.179             | 1.155          | 1.151              | 1.153                |
| C(2)-O(2)                                                                                                             | 1.138(3)  | 1.180             | 1.156          | 1.151                  | 1.154                | C(2)-O(2)    | 1.135 (3)  | 1.180             | 1.156          | 1.150              | 1.154                |
| C(3)-O(3)                                                                                                             | 1.068(3)  | 1.180             | 1.156          | 1.150                  | 1.153                | C(3)-O(3)    | 1.137 (3)  | 1.180             | 1.156          | 1.150              | 1.153                |
| C(1)-Mn-C(2)                                                                                                          | 85.7(1)   | 87.8              | 88.6           | 89.4                   | 87.9                 | C(1)-Mn-C(2) | 85.57 (9)  | 86.6              | 87.3           | 87.4               | 85.9                 |
| C(1)-Mn-C(3)                                                                                                          | 86.1(1)   | 94.1              | 93.8           | 94.5                   | 92.9                 | C(1)-Mn-C(3) | 88.37 (9)  | 93.5              | 93.1           | 93.5               | 85.9                 |
| C(1)-Mn-N(1)                                                                                                          | 177.0(1)  | 171.5             | 171.8          | 170.7                  | 171.9                | C(1)-Mn-N(1) | 175.05 (8) | 173.7             | 174.1          | 173.6              | 174.                 |
| C(1)-Mn-N(3)                                                                                                          | 100.2(1)  | 97.6              | 97.8           | 97.4                   | 98.9                 | C(1)-Mn-N(3) | 100.06 (8) | 99.2              | 99.4           | 99.8               | 101.1                |
| C(1)-Mn-Br                                                                                                            | 96.32(9)  | 84.5              | 85.3           | 85.0                   | 86.3                 | C(1)-Mn-Br   | 87.39 (6)  | 85.1              | 85.9           | 85.7               | 86.9                 |
| C(2)-Mn-C(3)                                                                                                          | 92.2(1)   | 93.7              | 92.8           | 93.7                   | 169.7                | C(2)-Mn-C(3) | 90.53 (9)  | 94.4              | 93.45          | 94.6               | 92.9                 |
| N(1)-Mn-C(2)                                                                                                          | 96.2(1)   | 94.1              | 94.2           | 94.2                   | 95.3                 | N(1)-Mn-C(2) | 95.91 (8)  | 94.4              | 94.7           | 94.5               | 95.9                 |
| C(2)-Mn-N(3)                                                                                                          | 173.9(1)  | 169.3             | 169.4          | 168.5                  | 169.7                | C(2)-Mn-N(3) | 169.00 (8) | 168.1             | 168.3          | 167.4              | 169.1                |
| C(2)-Mn-Br                                                                                                            | 87.64(9)  | 87.2              | 88.6           | 88.2                   | 90.1                 | C(2)-Mn-Br   | 87.63 (7)  | 86.9              | 88.4           | 88.2               | 89.9                 |
| N(1)-Mn-C(3)                                                                                                          | 91.4(1)   | 93.9              | 93.7           | 93.8                   | 94.4                 | N(1)-Mn-C(3) | 96.33 (8)  | 92.6              | 92.3           | 92.3               | 93.1                 |
| C(3)-Mn-N(3)                                                                                                          | 89.9(1)   | 95.1              | 95.1           | 94.9                   | 95.0                 | C(3)-Mn-N(3) | 99.02 (8)  | 95.6              | 95.7           | 95.1               | 95.1                 |
| C(3)-Mn-Br                                                                                                            | 177.52(9) | 178.3             | 178.2          | 83.2                   | 177.4                | C(3)-Mn-Br   | 175.50 (7) | 178.0             | 177.9          | 177.1              | 177.1                |
| N(1)-Mn-N(3)                                                                                                          | 77.98(9)  | 79.2              | 78.2           | 77.7                   | 76.9                 | N(1)-Mn-N(3) | 77.71 (6)  | 78.7              | 77.6           | 77.1               | 76.3                 |
| N(1)-Mn-Br                                                                                                            | 86.17(7)  | 87.4              | 87.1           | 86.5                   | 86.3                 | N(1)-Mn-Br   | 87.95 (5)  | 88.7              | 88.6           | 88.3               | 87.5                 |
| N(3)-Mn-Br                                                                                                            | 90.01(6)  | 84.2              | 83.5           | 83.2                   | 82.7                 | N(3)-Mn-Br   | 83.23 (4)  | 83.2              | 82.6           | 82.2               | 82.2                 |

\*Gen: LANL2DZ for bromine atom and 6-31G(d) for the rest of the elements

Table S2†: Selected theoretical bond lengths (Å) and angles (°) of complex **3**.

|              | B3LYP/<br>LANL2DZ | B3LYP/<br>Gen* | B3LYP/<br>def2-SVP | M05/<br>def2-<br>SVP |
|--------------|-------------------|----------------|--------------------|----------------------|
| Mn-C(1)      | 1.812             | 1.803          | 1.817              | 1.789                |
| Mn-C(2)      | 1.812             | 1.806          | 1.817              | 1.789                |
| Mn-C(3)      | 1.793             | 1.784          | 1.804              | 1.785                |
| Mn-N(1)      | 2.042             | 2.064          | 2.085              | 2.089                |
| Mn-N(3)      | 2.072             | 2.093          | 2.113              | 2.131                |
| Mn-Br        | 2.603             | 2.635          | 2.554              | 2.515                |
| C(1)-O(1)    | 1.180             | 1.156          | 1.150              | 1.153                |
| C(2)-O(2)    | 1.179             | 1.155          | 1.149              | 1.153                |
| C(3)-O(3)    | 1.184             | 1.159          | 1.153              | 1.156                |
|              |                   |                |                    |                      |
| C(1)-Mn-C(2) | 89.8              | 90.9           | 91.0               | 90.0                 |
| C(1)-Mn-C(3) | 93.9              | 93.0           | 94.0               | 92.5                 |
| C(1)-Mn-N(1) | 170.8             | 170.4          | 169.8              | 170.8                |
| C(1)-Mn-N(3) | 94.3              | 93.9           | 94.3               | 95.2                 |
| C(1)-Mn-Br   | 85.9              | 87.2           | 86.6               | 88.0                 |
| C(2)-Mn-C(3) | 93.9              | 93.2           | 94.0               | 92.5                 |
| N(1)-Mn-C(2) | 95.6              | 96.1           | 95.7               | 96.7                 |
| C(2)-Mn-N(3) | 170.7             | 171.6          | 170.3              | 171.2                |
| C(2)-Mn-Br   | 86.1              | 87.9           | 87.2               | 88.6                 |
| N(1)-Mn-C(3) | 93.2              | 93.1           | 93.0               | 93.4                 |
| C(3)-Mn-N(3) | 94.1              | 93.3           | 93.7               | 94.2                 |
| C(3)-Mn-Br   | 179.7             | 178.9          | 178.7              | 178.7                |
| N(1)-Mn-N(3) | 79.3              | 78.3           | 78.0               | 77.3                 |
| N(1)-Mn-Br   | 87.0              | 86.6           | 86.2               | 85.9                 |
| N(3)-Mn-Br   | 85.8              | 85.6           | 85.0               | 84.5                 |

\*Gen: LANL2DZ for bromine atom and 6-31G(d) for the rest of the elements

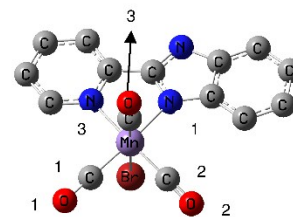

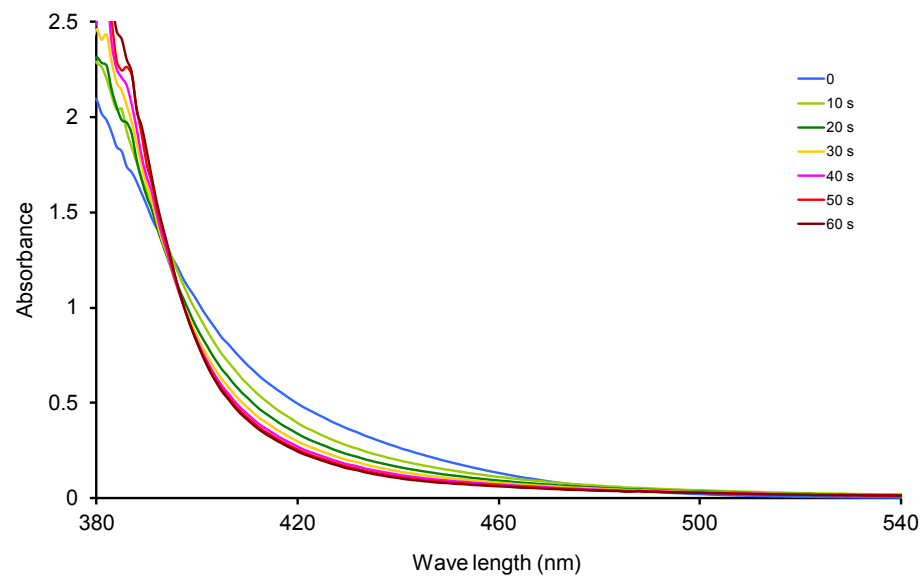

Fig. S5†: UV/Vis spectral changes of **1** upon the photolysis at 468 nm for one minute after pre-incubation in the dark for 16 h.

Table S3†: Computed excitation energies (eV), electronic transition configurations and oscillator strengths ( $f$ ) of the studied complexes

| (selected, $f > 0.02$ )    |                 |        |                                      |
|----------------------------|-----------------|--------|--------------------------------------|
| Energy (cm <sup>-1</sup> ) | Wavelength (nm) | $f$    | Major contributions (>20%)           |
| • Complex 3                |                 |        |                                      |
| • B3LYP/LANL2DZ            |                 |        |                                      |
| 23264                      | 429             | 0.0024 | HOMO→LUMO (76%)                      |
| 24228                      | 412             | 0.0302 | HOMO-1→LUMO (76%)                    |
| 28401                      | 352             | 0.0694 | HOMO-2→LUMO (78%)                    |
| 30033                      | 332             | 0.0787 | HOMO-5→LUMO (37%), HOMO-3→LUMO (43%) |
| 31255                      | 319             | 0.2111 | HOMO-5→LUMO (31%), HOMO-3→LUMO (34%) |
| 37519                      | 266             | 0.1025 | HOMO-3→LUMO+1 (68%)                  |
| • CAM-B3LYP/LANL2DZ        |                 |        |                                      |
| 25746                      | 388             | 0.0208 | HOMO-1→LUMO+2 (25%)                  |
| 31729                      | 315             | 0.0605 | HOMO→LUMO (38%)                      |
| 32146                      | 311             | 0.0214 | HOMO-1→LUMO (62%)                    |
| 33917                      | 294             | 0.345  | HOMO-2→LUMO (86%)                    |
| 35658                      | 280             | 0.1213 | HOMO-4→LUMO (26%), HOMO-3→LUMO (46%) |
| 40942                      | 244             | 0.0516 | HOMO→LUMO+1 (50%)                    |
| • CAM-B3LYP/def2-SVP       |                 |        |                                      |
| 25242                      | 396             | 0.02   | HOMO-1→LUMO+2 (26%)                  |
| 28766                      | 347             | 0.0028 | HOMO→LUMO (44%)                      |
| 34017                      | 293             | 0.4256 | HOMO-2→LUMO (77%)                    |
| 35862                      | 278             | 0.1555 | HOMO-4→LUMO (78%)                    |
| 37269                      | 268             | 0.0482 | HOMO-5→LUMO (64%)                    |
| 40603                      | 246             | 0.0349 | HOMO-6→LUMO (70%)                    |
| • Complex 1                |                 |        |                                      |
| • B3LYP/LANL2DZ            |                 |        |                                      |
| 22621                      | 442             | 0.0042 | HOMO→LUMO (79%)                      |
| 23988                      | 416             | 0.0269 | HOMO-1→LUMO (84%)                    |

|                      |     |        |                                        |
|----------------------|-----|--------|----------------------------------------|
| 27461                | 364 | 0.0817 | HOMO-3→LUMO (74%)                      |
| 29314                | 341 | 0.1100 | HOMO-4→LUMO (65%)                      |
| 31381                | 318 | 0.2451 | HOMO-7→LUMO (47%)                      |
| 34036                | 293 | 0.1086 | HOMO-6→LUMO+1 (71%)                    |
| 34690                | 288 | 0.1179 | HOMO-5→LUMO+1 (49%)                    |
| • CAM-B3LYP/LANL2DZ  |     |        |                                        |
| 25461                | 392 | 0.0176 | HOMO-1→LUMO+3 (20%)                    |
| 29545                | 338 | 0.0216 | HOMO→LUMO (25%)                        |
| 33138                | 301 | 0.4448 | HOMO-3→LUMO (52%), HOMO-2→LUMO (24%)   |
| 34965                | 285 | 0.2086 | HOMO-5→LUMO (52%)                      |
| 39844                | 251 | 0.0583 | HOMO-8→LUMO (34%), HOMO-2→LUMO+1 (23%) |
| • CAM-B3LYP/def2-SVP |     |        |                                        |
| 23783                | 420 | 0.0017 | HOMO→LUMO+3 (29%)                      |
| 25088                | 398 | 0.0206 | HOMO-1→LUMO+3 (30%)                    |
| 27898                | 358 | 0.0131 | HOMO→LUMO (44%)                        |
| 28233                | 354 | 0.0052 | HOMO-1→LUMO (23%)                      |
| 28728                | 348 | 0.0301 | HOMO-1→LUMO (23%)                      |
| 32147                | 311 | 0.4179 | HOMO-3→LUMO (65%)                      |
| 33886                | 295 | 0.2371 | HOMO-5→LUMO (70%)                      |
| 37226                | 268 | 0.1479 | HOMO-7→LUMO (23%), HOMO-2→LUMO+1 (41%) |
| 39026                | 256 | 0.0553 | HOMO-8→LUMO (29%)                      |
| • Complex 2          |     |        |                                        |
| • B3LYP/LANL2DZ      |     |        |                                        |
| 22662                | 441 | 0.0087 | HOMO→LUMO (75%)                        |
| 24183                | 413 | 0.0248 | HOMO-1→LUMO (77%)                      |
| 25368                | 394 | 0.0021 | HOMO→LUMO+2 (22%)                      |
| 28918                | 345 | 0.0472 | HOMO→LUMO+1 (32%)                      |
| 29350                | 340 | 0.1068 | HOMO-5→LUMO (51%)                      |
| 31065                | 321 | 0.2522 | HOMO-7→LUMO (59%), HOMO-5→LUMO (23%)   |
| 34904                | 286 | 0.0784 | HOMO-5→LUMO+1 (43%)                    |

|                      |     |        |                                          |
|----------------------|-----|--------|------------------------------------------|
| • CAM-B3LYP/LANL2DZ  |     |        |                                          |
| 24212                | 413 | 0.0023 | HOMO→LUMO+3 (23%)                        |
| 30673                | 326 | 0.0503 | HOMO→LUMO (46%)                          |
| 31782                | 314 | 0.0154 | HOMO-2→LUMO (21%), HOMO→LUMO+4 (22%)     |
| 33273                | 300 | 0.2946 | HOMO-4→LUMO (54%)                        |
| 34361                | 291 | 0.1874 | HOMO-3→LUMO (23%)                        |
| 39150                | 255 | 0.0337 | HOMO-2→LUMO+1 (34%), HOMO-1→LUMO+1 (36%) |
| • CAM-B3LYP/def2-SVP |     |        |                                          |
| 25150                | 397 | 0.0195 | HOMO-1→LUMO+3 (26%)                      |
| 27797                | 359 | 0.015  | HOMO→LUMO (28%)                          |
| 28509                | 350 | 0.0114 | HOMO-1→LUMO (20%), HOMO→LUMO (20%)       |
| 32200                | 310 | 0.2338 | HOMO-4→LUMO (57%)                        |
| 32526                | 307 | 0.2624 | HOMO-2→LUMO (27%)                        |
| 33672                | 296 | 0.1951 | HOMO-5→LUMO (70%)                        |
| 37104                | 269 | 0.1185 | HOMO-1→LUMO+1 (59%)                      |

Only strong transitions with an oscillator strength > 0.01 in the 250–800 nm range are reported. Only contributions >20% are listed. The reversed order is due to state experiencing a smaller solvent shift than most of the others.



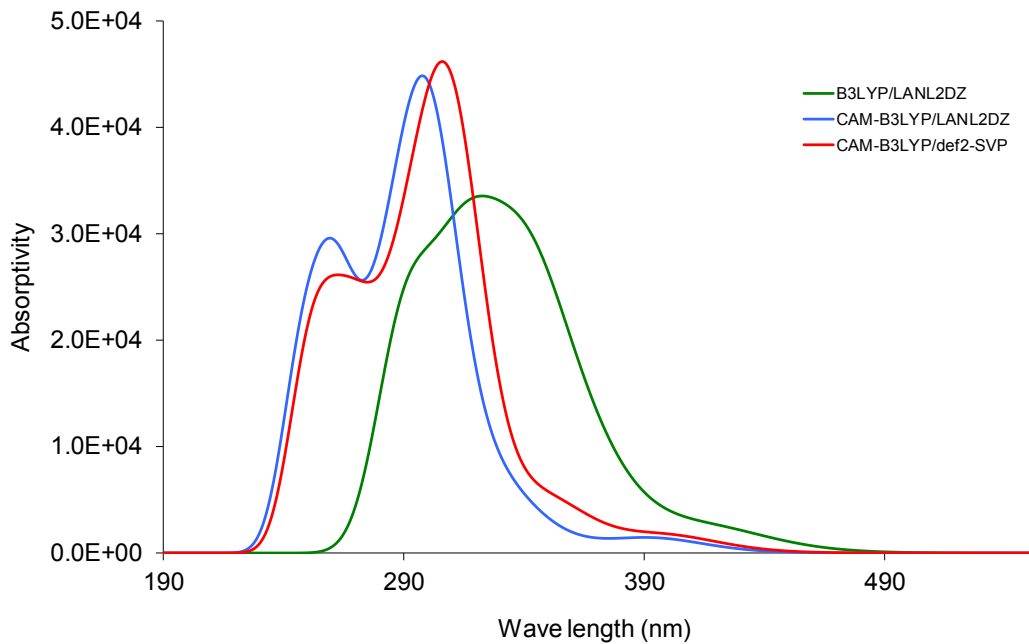

a)

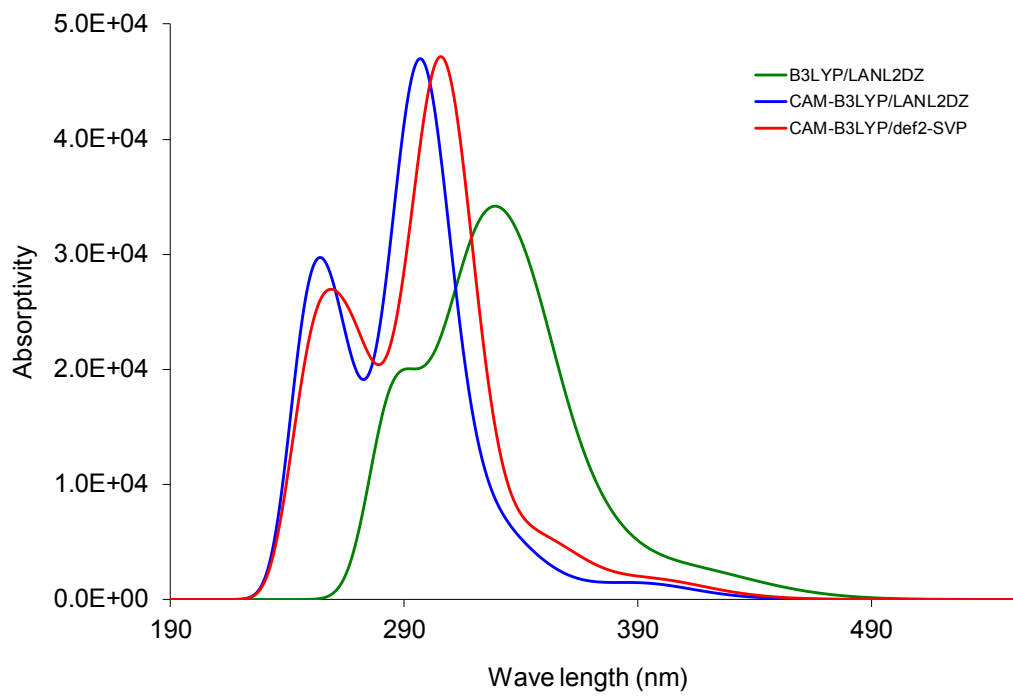

b)

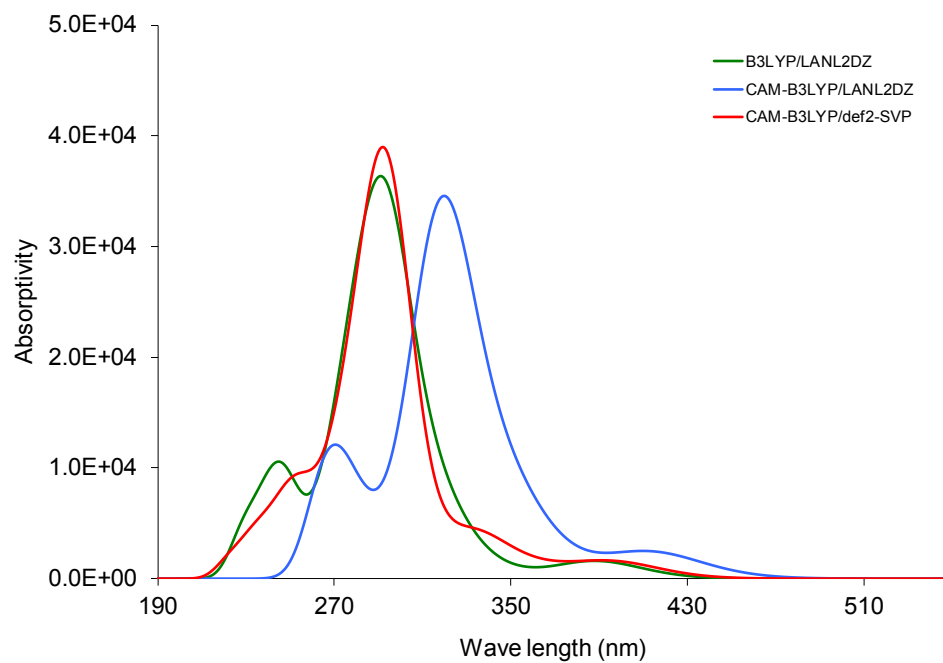

c)

Fig. S6†: TD-DFT calculated spectra of **1-3**.
